# Supplementary material for: Predicted impact of extending the screening interval for diabetic retinopathy: the Scottish Diabetic Retinopathy Screening programme
Source: PubMed Central journal article supplement — Diabetologia. 2013 May 21;56(8):1716–25. doi: 10.1007/s00125-013-2928-7 (PMC3699707; doi:10.1007/s00125-013-2928-7), 2013-05-21
Supplement: 125_2013_2928_MOESM1_ESM.pdf [file 125_2013_2928_MOESM1_ESM.pdf]

Figure 1a

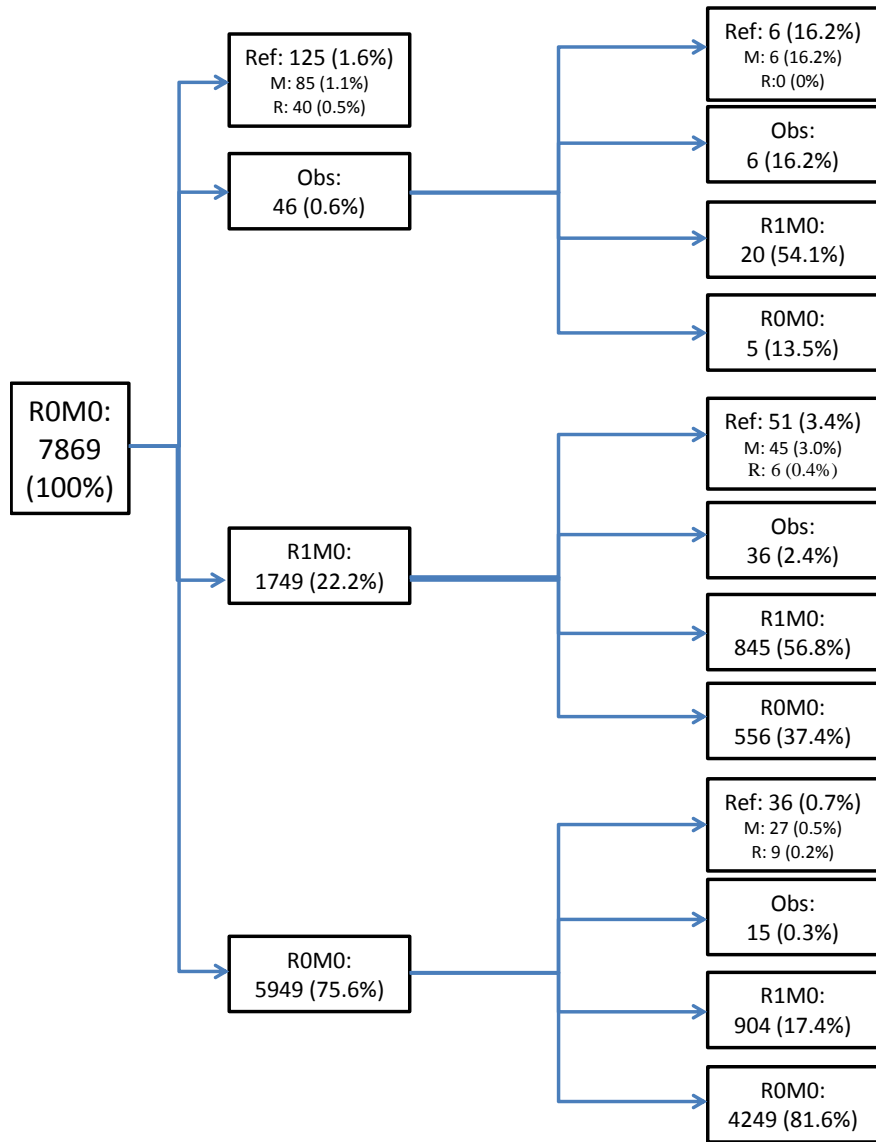

|                   |                    |                    |
|-------------------|--------------------|--------------------|
| N (%)             | 7869 (100%)        | 6729 (85.5%)       |
| Interval (months) | 12.6 (11.9 – 14.7) | 12.8 (12.0 – 14.2) |

Figure 1b

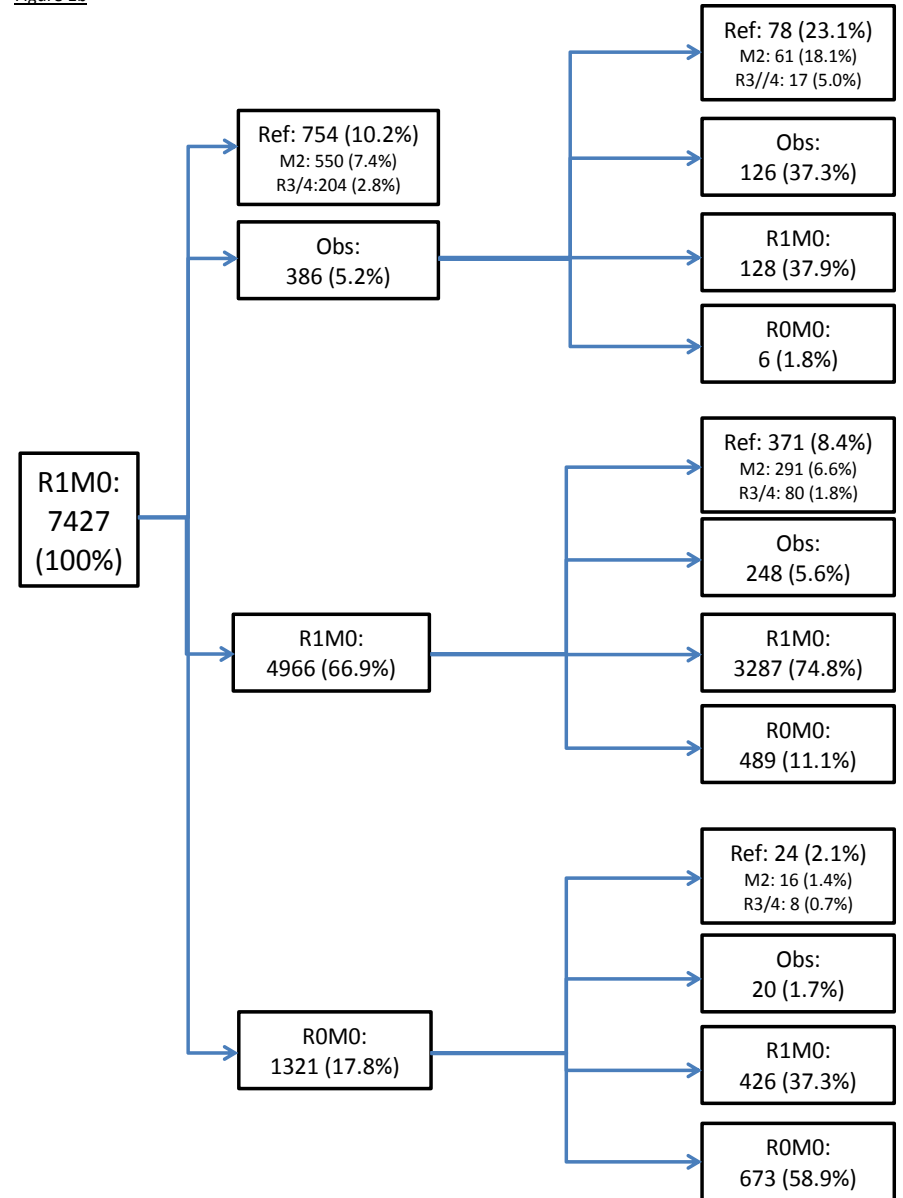

|                   |                    |                    |
|-------------------|--------------------|--------------------|
| N (%)             | 7427 (100%)        | 5876 (79.1%)       |
| Interval (months) | 12.5 (11.9 – 14.7) | 12.7 (11.9 – 14.0) |

Figure 1c

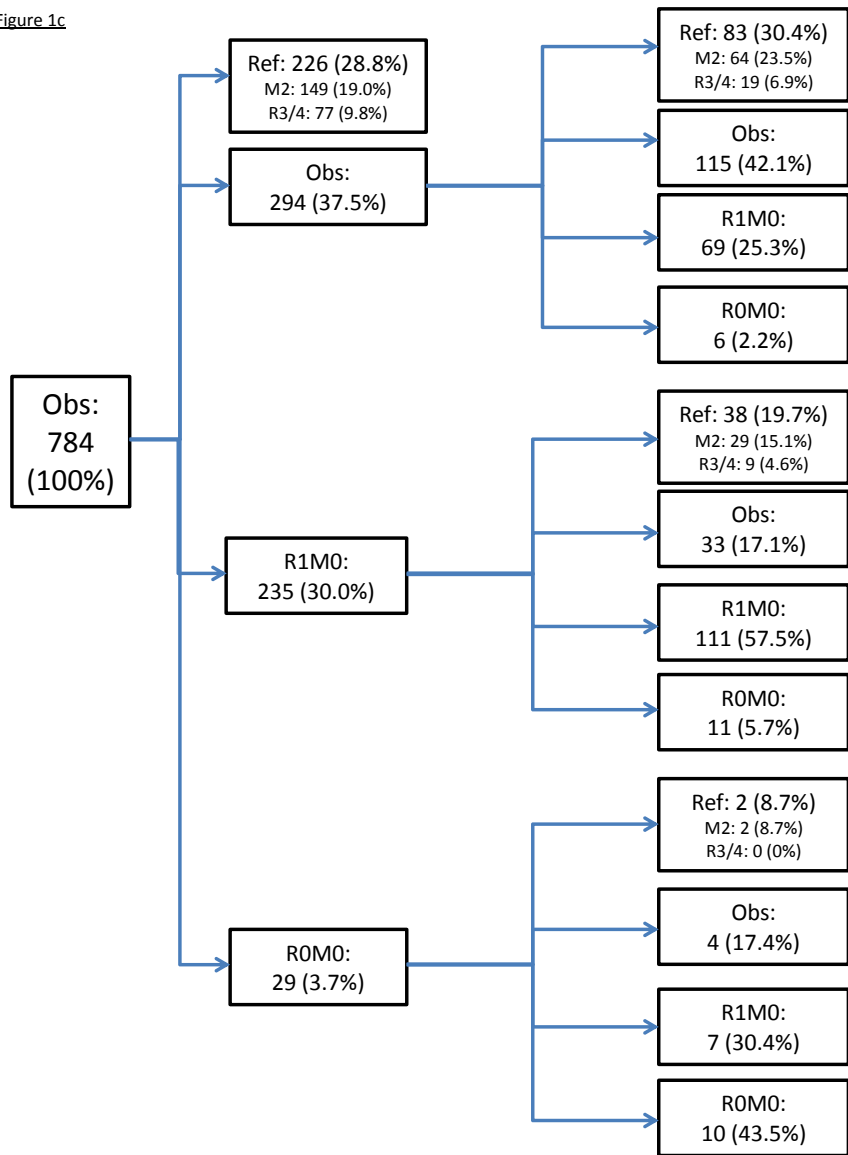

|                   |                  |                   |
|-------------------|------------------|-------------------|
| N (%)             | 784 (100%)       | 489 (62.4%)       |
| Interval (months) | 7.4 (6.2 - 10.5) | 11.1 (6.5 - 13.4) |

Figure 1d

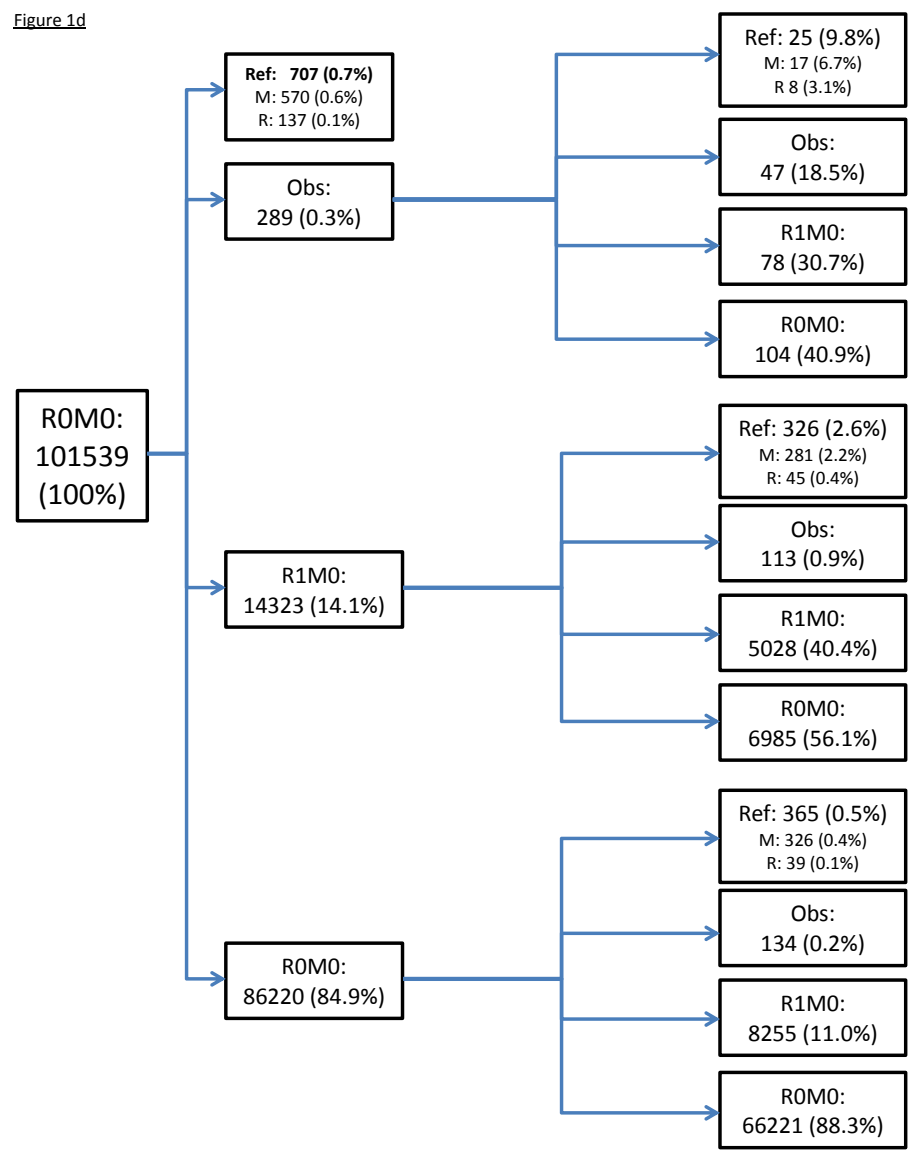

|                   |                    |                    |
|-------------------|--------------------|--------------------|
| N (%)             | 101,539 (100%)     | 87,681 (86.4%)     |
| Interval (months) | 12.5 (11.9 - 14.2) | 12.7 (12.0 - 13.8) |

Figure 1e

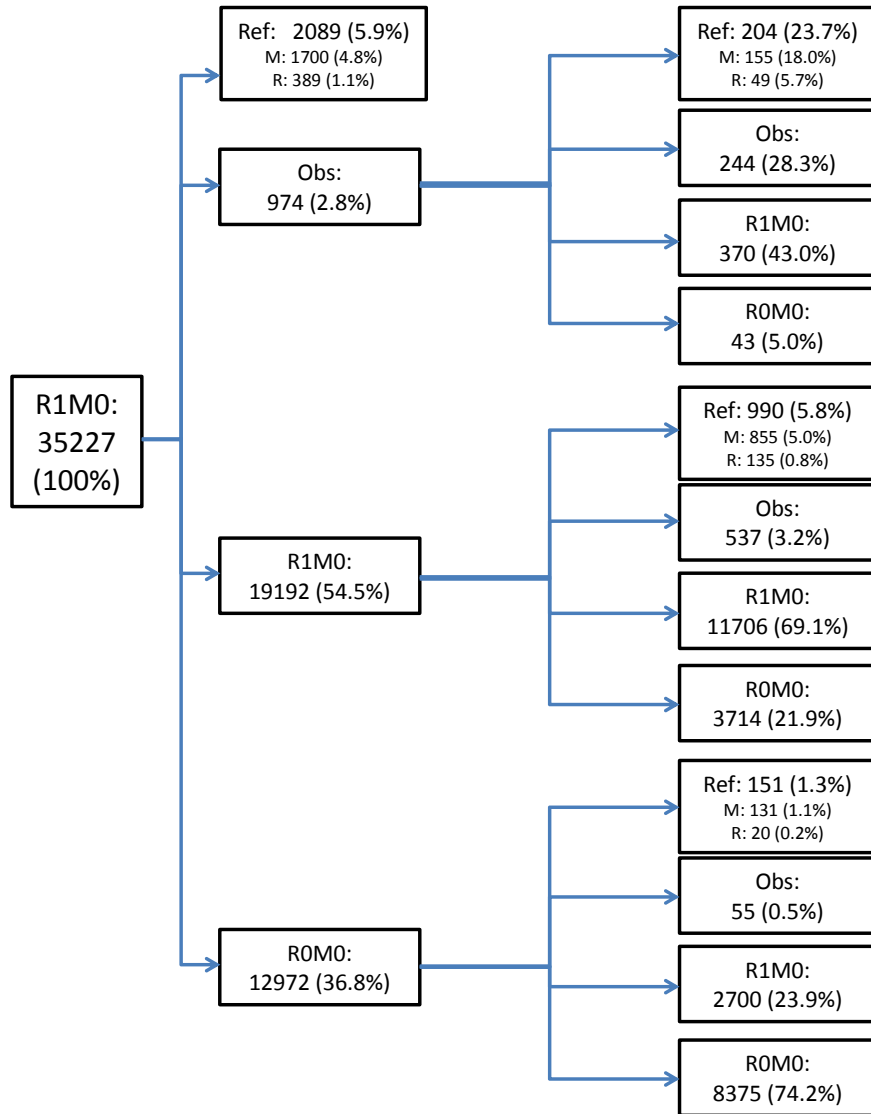

|                   |                    |                    |
|-------------------|--------------------|--------------------|
| N (%)             | 35,227 (100%)      | 29,089 (82.6%)     |
| Interval (months) | 12.4 (11.8 – 14.1) | 12.5 (11.9 – 13.7) |

Figure 1f

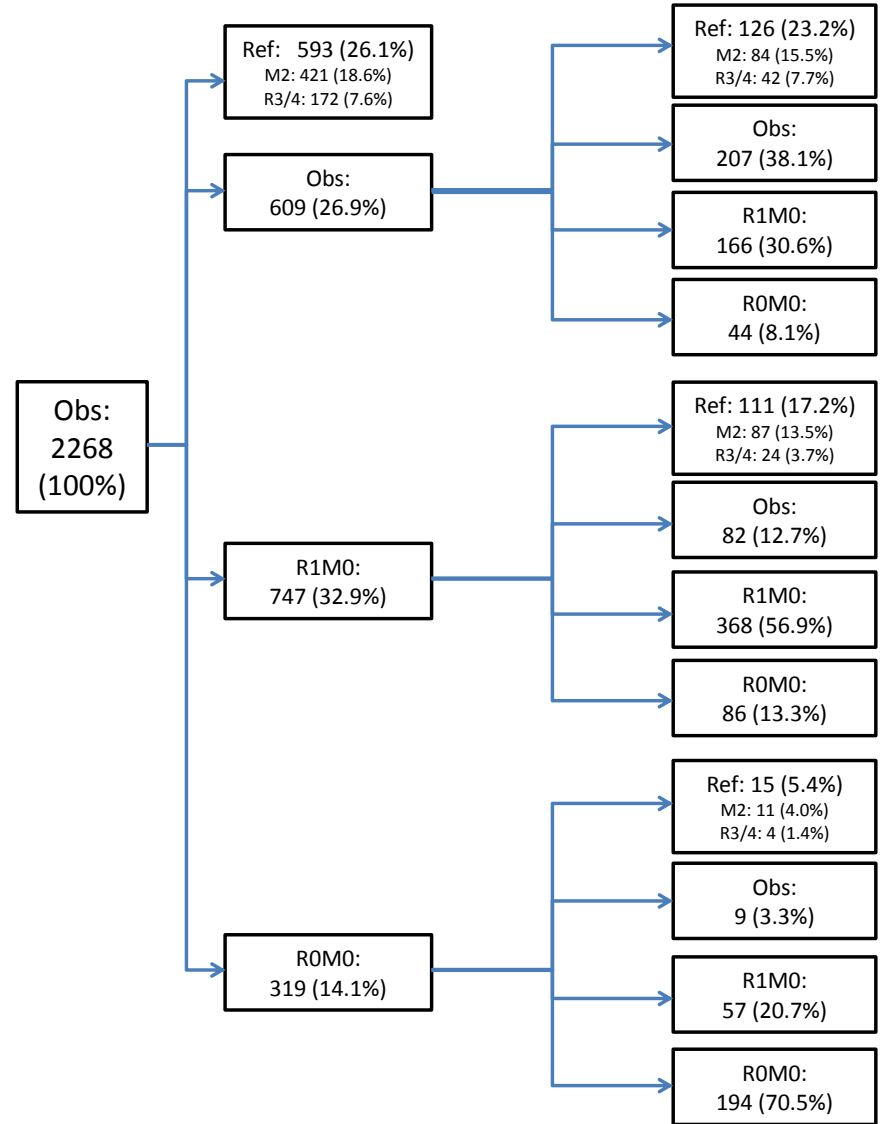

|                   |                 |                   |
|-------------------|-----------------|-------------------|
| N (%)             | 2,268 (100%)    | 1,465 (64.6%)     |
| Interval (months) | 6.7 (6.0 – 8.7) | 11.9 (7.1 – 13.1) |
