# Supplementary material for: Predicted impact of extending the screening interval for diabetic retinopathy: the Scottish Diabetic Retinopathy Screening programme
Source: PubMed Central journal article supplement — Diabetologia. 2013 May 21;56(8):1716–25. doi: 10.1007/s00125-013-2928-7 (PMC3699707; doi:10.1007/s00125-013-2928-7), 2013-05-21
Supplement: 125_2013_2928_MOESM2_ESM.pdf [file 125_2013_2928_MOESM2_ESM.pdf]

**Electronic Supplementary Material**

**ESM Table 1** Median interval to next screen by number of screenings during follow-up

| No. screens | All             |                             | Type 1 diabetes |                             | Type 2 diabetes |                             |
|-------------|-----------------|-----------------------------|-----------------|-----------------------------|-----------------|-----------------------------|
|             | N (%)           | Screening Interval (months) | N (%)           | Screening Interval (months) | N (%)           | Screening Interval (months) |
| ≥ 2         | 155,114 (100.0) | 12.6 (12.0-14.4)            | 16,080 (100.0)  | 12.7 (11.9-14.8)            | 139,034 (100.0) | 12.6 (12.0 -14.3)           |
| ≥ 3         | 131,329 (84.7)  | 12.8 ( 12.1-14.0)           | 13,094 (81.4)   | 12.8 (12.1-14.3)            | 118,235 (85.0)  | 12.8 (12.1-13.9)            |
| ≥ 4         | 105,477 (68.0)  | 12.8 (12.1-13.7)            | 10,020 (62.3)   | 12.7 (11.9-13.8)            | 95,457 (68.7)   | 12.8 (12.1-13.7)            |
| ≥ 5         | 56,659 (36.5)   | 12.6 (12.1-13.5)            | 5,649 (35.1)    | 12.5 (11.8-13.5)            | 51,010 (36.7)   | 12.7 (12.1-13.5)            |
| ≥ 6         | 8,763 (5.6)     | 12.4 (11.7-12.9)            | 1,446 (9.0)     | 12.2 (10.8-12.8)            | 7,317 (5.2)     | 12.4 (11.8-12.9)            |

Screening interval is shown as median with interquartile range (IQR)  
 Follow-up is truncated at the time of first detection of referable disease.
