# Supplementary material for: Predicted impact of extending the screening interval for diabetic retinopathy: the Scottish Diabetic Retinopathy Screening programme
Source: PubMed Central journal article supplement — Diabetologia. 2013 May 21;56(8):1716–25. doi: 10.1007/s00125-013-2928-7 (PMC3699707; doi:10.1007/s00125-013-2928-7), 2013-05-21
Supplement: 125_2013_2928_MOESM3_ESM.pdf [file 125_2013_2928_MOESM3_ESM.pdf]

**Electronic Supplementary Material**

**ESM Table 2** Prevalence of Retinopathy Grades by Diabetes Type and Time Since Baseline Examination

| Retinopathy category                              | Years since entry      |              |              |              |             |                        |               |               |               |              |
|---------------------------------------------------|------------------------|--------------|--------------|--------------|-------------|------------------------|---------------|---------------|---------------|--------------|
|                                                   | <i>Type 1 diabetes</i> |              |              |              |             | <i>Type 2 diabetes</i> |               |               |               |              |
|                                                   | 1                      | 2            | 3            | 4            | 5           | 1                      | 2             | 3             | 4             | 5            |
| No visible retinopathy                            | 5718<br>(46)           | 5472<br>(46) | 4626<br>(46) | 2501<br>(45) | 413<br>(51) | 78916<br>(72)          | 77406<br>(73) | 68717<br>(74) | 36012<br>(73) | 3457<br>(76) |
| Mild background retinopathy                       | 5325<br>(43)           | 5257<br>(44) | 4546<br>(45) | 2534<br>(46) | 340<br>(42) | 26898<br>(25)          | 25872<br>(24) | 21971<br>(24) | 11829<br>(24) | 947<br>(21)  |
| Observable retinopathy / maculopathy              | 600<br>(5)             | 541<br>(4)   | 431<br>(4)   | 225<br>(4)   | 25<br>(3)   | 1498<br>(2)            | 1282<br>(1)   | 990<br>(1)    | 517<br>(1)    | 36<br>(1)    |
| Referable maculopathy                             | 560<br>(5)             | 486<br>(4)   | 415<br>(4)   | 230<br>(4)   | 27<br>(3)   | 1956<br>(2)            | 1720<br>(2)   | 1478<br>(2)   | 819<br>(2)    | 73<br>(2)    |
| Referable background or proliferative retinopathy | 182<br>(1)             | 133<br>(2)   | 83<br>(1)    | 48<br>(1)    | 11<br>(1)   | 449<br>(1)             | 293<br>(0)    | 245<br>(0)    | 245<br>(0)    | 11<br>(0)    |
| N                                                 | 12,385                 | 11,889       | 10,101       | 5,538        | 816         | 109,717                | 106,573       | 93,401        | 49,322        | 4,524        |

Data are number of exams and percentage of all exams recorded within each year time band with total number of exams included given in the bottom row
