# Supplementary material for: Predicted impact of extending the screening interval for diabetic retinopathy: the Scottish Diabetic Retinopathy Screening programme
Source: PubMed Central journal article supplement — Diabetologia. 2013 May 21;56(8):1716–25. doi: 10.1007/s00125-013-2928-7 (PMC3699707; doi:10.1007/s00125-013-2928-7), 2013-05-21
Supplement: 125_2013_2928_MOESM4_ESM.pdf [file 125_2013_2928_MOESM4_ESM.pdf]

## Electronic Supplementary Material

**ESM Table 3** Transition Intensity Matrix for Type 1 Diabetes and the 5 State Model

|         | <b>state 1</b> | <b>state 2</b> | <b>state 3</b> | <b>state 4</b> | <b>state 5</b> | <b>Initial probabilities</b> |
|---------|----------------|----------------|----------------|----------------|----------------|------------------------------|
| state 1 | -              | 0.1123         | 0              | 0              | 0              | 0.46                         |
| state 2 | 0.0067         | -              | 0.1129         | 0              | 0              | 0.45                         |
| state 3 | 0              | 0.0176         | -              | 0.6282         | 0.0808         | 0.09                         |
| state 4 | 0              | 0              | 0              | -              | 0              | 0.0001                       |
| state 5 | 0              | 0              | 0              | 0              | -              | 0.0001                       |

Q matrix of transition intensities, matrix with covariates set to their means. Diagonal elements (which are minus the sum of the other elements in the row) are omitted. Zero elements are those that were specified as zero in the model.
