# Supplementary material for: Predicted impact of extending the screening interval for diabetic retinopathy: the Scottish Diabetic Retinopathy Screening programme
Source: PubMed Central journal article supplement — Diabetologia. 2013 May 21;56(8):1716–25. doi: 10.1007/s00125-013-2928-7 (PMC3699707; doi:10.1007/s00125-013-2928-7), 2013-05-21
Supplement: 125_2013_2928_MOESM7_ESM.pdf [file 125_2013_2928_MOESM7_ESM.pdf]

## Electronic Supplementary Material

**ESM Table 6** Emission Matrix Type 2 Diabetes and the 5 State Model

|         | <b>No visible retinopathy</b> | <b>Mild background retinopathy</b> | <b>Observable retinopathy or maculopathy</b> | <b>Referable maculopathy</b> | <b>Referable background or Proliferative retinopathy</b> |
|---------|-------------------------------|------------------------------------|----------------------------------------------|------------------------------|----------------------------------------------------------|
| state 1 | 0.9376                        | 0.0624                             | 0                                            | 0                            | 0                                                        |
| state 2 | 0.1743                        | 0.8183                             | 0.0075                                       | 0                            | 0                                                        |
| state 3 | 0                             | 0.4920                             | 0.5069                                       | 0.00111                      | 0                                                        |
| state 4 | 0                             | 0                                  | 0.0034                                       | 0.8986                       | 0.0980                                                   |
| state 5 | 0                             | 0                                  | 0                                            | 0.1430                       | 0.8570                                                   |

Zero elements are those which were specified in the model as zero
